# Supplementary material
Source: Research Square preprint supplement (doi:10.21203/rs.3.rs-9519223/v1)
Supplement: Supplementary file 1 [file f7ad8d504f466c6bfd98a7fc.docx]

This table tabulates the aggregated scores for the five competitive dimensions () across all 27 decision-making units (DMUs). These scores were computed strictly adhering to the aggregation protocols and calculation methods defined in the original OCE framework. Consequently, these standardised values serve as the valid inputs for the Two-stage Network Super-efficiency BoD–DEA model to perform the efficiency diagnosis.

Table S1. Calculated scores of the five competitive dimensions for the sampled contractors.

| DMU |  |  |  |  |  |
| --- | --- | --- | --- | --- | --- |
| DMU01 | 0.740 | 0.168 | 0.871 | 0.714 | 1.553 |
| DMU02 | 0.779 | 0.007 | 0.939 | 0.743 | 1.268 |
| DMU03 | 0.936 | 0.227 | 0.806 | 0.741 | 1.902 |
| DMU04 | 0.733 | 0.018 | 0.797 | 0.700 | 1.305 |
| DMU05 | 0.614 | 0.172 | 0.852 | 0.167 | 0.888 |
| DMU06 | 0.654 | 0.007 | 0.893 | 0.183 | 0.937 |
| DMU07 | 0.899 | 0.116 | 0.727 | 0.769 | 1.392 |
| DMU08 | 0.769 | 0.064 | 0.862 | 0.250 | 0.734 |
| DMU09 | 0.862 | 0.223 | 0.893 | 0.800 | 1.069 |
| DMU10 | 0.817 | 0.285 | 0.865 | 0.571 | 0.928 |
| DMU11 | 0.732 | 0.012 | 0.801 | 0.667 | 1.103 |
| DMU12 | 0.631 | 0.181 | 0.855 | 0.750 | 0.982 |
| DMU13 | 0.657 | 0.006 | 0.875 | 0.571 | 0.706 |
| DMU14 | 0.602 | 0.013 | 0.832 | 0.214 | 0.725 |
| DMU15 | 0.700 | 0.076 | 0.780 | 0.800 | 0.777 |
| DMU16 | 0.643 | 0.003 | 0.868 | 0.923 | 0.696 |
| DMU17 | 0.908 | 0.292 | 0.808 | 0.750 | 1.418 |
| DMU18 | 0.875 | 0.005 | 0.894 | 0.773 | 1.392 |
| DMU19 | 0.865 | 0.024 | 0.690 | 0.745 | 1.544 |
| DMU20 | 0.686 | 0.004 | 0.795 | 0.567 | 0.872 |
| DMU21 | 0.630 | 0.003 | 0.779 | 0.333 | 0.613 |
| DMU22 | 0.881 | 0.262 | 0.885 | 0.700 | 1.073 |
| DMU23 | 0.890 | 0.011 | 0.551 | 0.500 | 0.821 |
| DMU24 | 0.591 | 0.198 | 0.778 | 0.675 | 1.445 |
| DMU25 | 0.732 | 0.272 | 0.821 | 0.833 | 0.817 |
| DMU26 | 0.948 | 0.029 | 0.821 | 0.625 | 1.019 |
| DMU27 | 0.927 | 0.304 | 0.742 | 0.622 | 1.069 |
